# Supplementary material for: Mathematical modelling reveals cellular dynamics within tumour spheroids
Source: PubMed Central journal article supplement (PMC7455028; doi:10.1371/journal.pcbi.1007961), 2020-08-18
Supplement: pcbi.1007961.s002.pdf [file pcbi.1007961.s002.pdf]

## Supporting information

For: **Mathematical modelling reveals cellular dynamics within tumour spheroids**

by Joshua A. Bull, Franziska Mech, Tom Quaiser, Sarah L. Waters, Helen M. Byrne

**S2 Appendix: Algorithm for updating the cell cycle** Algorithm 1 shows an outline of the algorithm used to update the spring lengths and cell cycles of each cell at each timestep.

```

Input: All cells, viable or necrotic
for All cells do
  if Cell is alive then
    if  $\omega_q < \omega \leq 1$  then
      // Cell is proliferative
      // Move cell through cell cycle by one timestep
      Set  $T_i = T_i + dt$ ;
      // Ensure hypoxia timer is unset
      Set  $\tilde{T}_i = 0$ ;
      // If cell is less than one hour old, increase the cell
      radius
      if  $T_i < 1$  then
        | Set  $s_i = s_i + R_{\text{Cell}}dt$ ;
      end
      // If cell is at end of cell cycle, proliferate
      if  $T_i = \tau_i$  then
        | Choose random location within  $R_{\text{int}}$  of cell  $i$ ;
        | Place daughter cell  $j$  in selected location;
        | Set  $s_i = \frac{R_{\text{Cell}}}{2}$ ;
        | Set  $s_j = \frac{R_{\text{Cell}}}{2}$ ;
        | Set  $T_i = 0$  for cells  $i$  and  $j$ ;
        | Choose new cell cycle durations  $\tau_i$  for cells  $i$  and  $j$ ;
      end
    else if  $\omega_h < \omega \leq \omega_q$  then
      // Cell is quiescent
      // Ensure hypoxia timer is unset
      Set  $\tilde{T}_i = 0$ ;
    else if  $\omega \leq \omega_h$  then
      // Cell is hypoxic
      // Increment hypoxia timer by one timestep
      Set  $\tilde{T}_i = \tilde{T}_i + dt$ ;
      // Check for cell death
      if  $\tilde{T}_i = \tilde{\tau}_i$  then
        | Mark cell as dead;
      end
    end
  else
    // Cell is necrotic
    // Reduce necrotic cell radius linearly over  $\bar{\tau}$  hours to
    model decay
    Set  $s_i = s_i - \frac{R_{\text{Cell}} dt}{\bar{\tau}}$ ;
    if  $s_i = 0$  then
      | Remove cell from simulation;
    end
  end
end

```

**Algorithm 1:** Pseudocode outlining the procedure used to update the cell cycle.
