# Supplementary material for: Mathematical modelling reveals cellular dynamics within tumour spheroids
Source: PubMed Central journal article supplement (PMC7455028; doi:10.1371/journal.pcbi.1007961), 2020-08-18
Supplement: pcbi.1007961.s003.pdf [file pcbi.1007961.s003.pdf]

## Supporting information

For: **Mathematical modelling reveals cellular dynamics within tumour spheroids**

by Joshua A. Bull, Franziska Mech, Tom Quaiser, Sarah L. Waters, Helen M. Byrne

**S3 Appendix: Non-dimensionalisation of oxygen equation** The dimensional equation governing the spatio-temporal evolution of the oxygen concentration is:

$$\frac{\partial \omega}{\partial t} = D_\omega \nabla^2 \omega - \kappa \omega \sum_i \delta(\mathbf{x} - \mathbf{x}_i). \quad (\text{S1})$$

where  $\mathbf{x}_i$  is the location of cell  $i$ , the parameter  $\kappa$  controls the oxygen consumption rate of tumour cells and the parameter  $D_\omega$  is the diffusion coefficient of oxygen.  $\delta(\mathbf{x} - \mathbf{x}_i)$  is a delta function which equals 1 when the argument is zero, and is otherwise equal to zero. We rescale Equation (S1) using the following scales:

$$\tilde{\omega} = \frac{\omega}{\omega_0}; \quad \tilde{t} = \frac{t}{t_0}; \quad \tilde{x} = \frac{x}{x_0}; \quad \tilde{y} = \frac{y}{x_0} \quad (\text{S2})$$

to obtain a non-dimensional form of Equation (S1):

$$\frac{\partial \tilde{\omega}}{\partial \tilde{t}} = \tilde{D}_\omega \nabla^2 \tilde{\omega} - \tilde{\kappa} \tilde{\omega} \sum_i \delta(x_0(\tilde{\mathbf{x}} - \tilde{\mathbf{x}}_i)). \quad (\text{S3})$$

where

$$\tilde{D}_\omega = \frac{D_\omega t_0}{x_0^2} \quad \text{and} \quad \tilde{\kappa} = \kappa t_0. \quad (\text{S4})$$

We choose  $t_0 = 1$  hour as the timescale and  $x_0 = 1$  cell diameter as the lengthscale. Dropping the tildes for convenience, the non-dimensional equation describing the spatio-temporal evolution of the oxygen concentration at position  $\mathbf{x}$  is thus

$$\frac{\partial \omega}{\partial t} = D_\omega \nabla^2 \omega - \kappa \omega \sum_i \delta(\mathbf{x} - \mathbf{x}_i) \quad (\text{S5})$$

where  $\mathbf{x}_i$  is the location of cell  $i$ , and values of the dimensionless parameters  $\kappa$  and  $D_\omega$  coincide with their dimensional equivalents due to our choice of timescales and lengthscales in Equation (S4). We note that for our choices of lengthscale and timescale the non-dimensional Equation (S5) and the dimensional Equation (S1) are identical, up to a rescaling of the oxygen concentration. We choose  $\omega_0 = \omega_\infty$ , to normalise concentration such that the oxygen concentration on the spheroid boundary in the non-dimensional system is 1.
