# Supplementary material for: Mathematical modelling reveals cellular dynamics within tumour spheroids
Source: PubMed Central journal article supplement (PMC7455028; doi:10.1371/journal.pcbi.1007961), 2020-08-18
Supplement: pcbi.1007961.s006.pdf [file pcbi.1007961.s006.pdf]

## Supporting information

For: **Mathematical modelling reveals cellular dynamics within tumour spheroids**

by Joshua A. Bull, Franziska Mech, Tom Quaiser, Sarah L. Waters, Helen M. Byrne

### **S6 Appendix: Predicting spheroid composition from microbead**

**observations** In Fig 6 we demonstrated that nearest-neighbours classification allows the quiescent proportion of the tumour spheroid radius to be estimated accurately. Fig F shows that the proliferative, hypoxic and necrotic proportions of the spheroid radius can be inferred by observing  $T_{\text{wait}}$  and  $V_r$  in the same way.

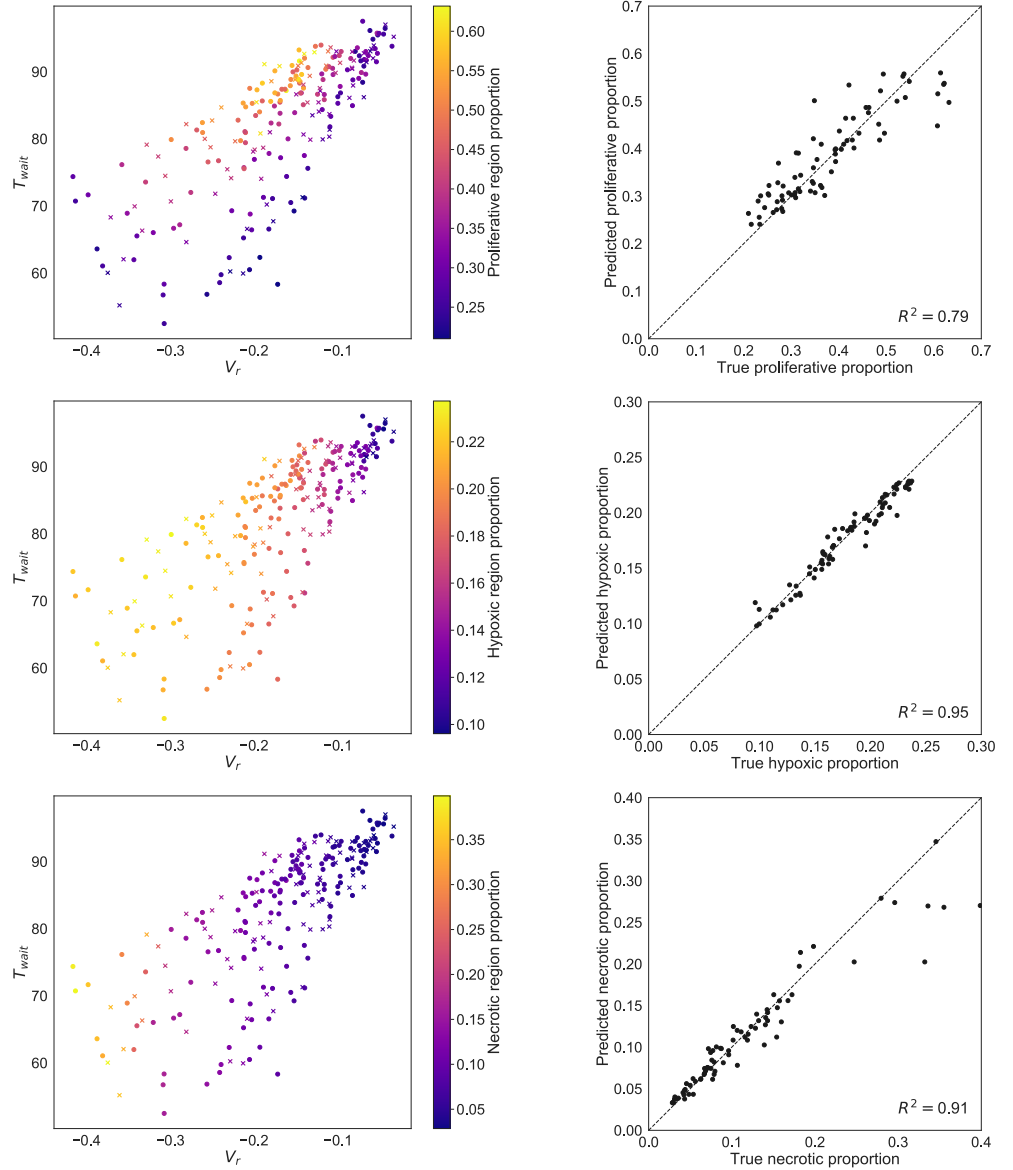

**Fig F.** Extension of Fig 6 to predict the proportion of the spheroid radius occupied by the proliferative, hypoxic and necrotic compartments.
